# Supplementary material for: Interventions for treatment of COVID-19: Second edition of a living systematic review with meta-analyses and trial sequential analyses (The LIVING Project)
Source: PLoS One. 2021 Mar 11;16(3):e0248132. doi: 10.1371/journal.pone.0248132 (PMC7954033; doi:10.1371/journal.pone.0248132)
Supplement: S54 Table — (DOCX) [file pone.0248132.s056.docx]

S54 Table. Summary of Findings

| **Calcifediol compared with standard care for COVID-19** | | | | | | |
| --- | --- | --- | --- | --- | --- | --- |
| **Patients or population:** Anyone with a diagnosis of COVID-19  **Setting:** Any setting  **Intervention:** Calcifediol  **Comparison:** Standard care | | | | | | |
| **Outcomes** | **Anticipated absolute effects* (95% CI)** | | **Relative effect (95% CI)** | **No of participants (studies)** | **Certainty of the evidence (GRADE)** | **Comments** | |
| **Risk with standard care** | **Risk with**  **Calcifediol** |
| **All-cause mortality**  *Follow-up: until admission to ICU, hospital discharge or death* | 77 per 1,000 | **0 per 1,000** | - | 76  (1 RCT) | ⨁◯◯◯ VERY LOW a,b,c | - | |
| **Serious adverse events** *Follow-up: until admission to ICU, hospital discharge or death* | 77 per 1,000 | **0 per 1,000** | - | 76  (1 RCT) | ⨁◯◯◯ VERY LOW a,b,c | No mention of serious adverse effect, only mortality | |
| **Admission to intensive care** *Follow-up: until admission to ICU, hospital discharge or death* | 500 per 1,000 | **2 per 1,000** | - | 76  (1 RCT) | ⨁◯◯◯ VERY LOW a,b,c | - | |
| **Mechanical ventilation** | - | - | - | - | - | Outcome not yet measured or reported | |
| **Renal replacement therapy** | - | - | - | - | - | Outcome not yet measured or reported | |
| **Quality of Life** | - | - | - | - | - | Outcome not yet measured or reported | |
| **Non-serious adverse events** *Follow-up: unknown* | - | - | - | - | - | Outcome not yet measured or reported | |
| *The risk in the intervention group (and its 95% confidence interval) is based on the assumed risk in the comparison group and the relative effect of the intervention (and its 95% CI).  **RR:** Risk ratio **CI:** Confidence interval; **GRADE:** GRADE Working Group grades of evidence | | | | | | |
| **GRADE Working Group grades of evidence**  **High certainty:** We are very confident that the true effect lies close to that of the estimate of the effect **Moderate certainty:** We are moderately confident in the effect estimate: The true effect is likely to be close to the estimate of the effect, but there is a possibility that it is substantially different **Low certainty:** Our confidence in the effect estimate is limited: The true effect may be substantially different from the estimate of the effect **Very low certainty:** We have very little confidence in the effect estimate: The true effect is likely to be substantially different from the estimate of effect | | | | | | |

**Explanations**

a. Downgraded 2 for risk of bias

b. Downgraded 1 for indirectness due to a single study from a single country, therefore results in this population might not be generalizable to other settings

c. Downgraded 2 for imprecision due to low number of participants and few or no events
