# Supplementary material for: Interventions for treatment of COVID-19: Second edition of a living systematic review with meta-analyses and trial sequential analyses (The LIVING Project)
Source: PLOS journal article supplement (doi:10.1371/journal.pone.0248132), 2021-03-11
Supplement: S130 (10.1371/journal.pone.0248132.s130) [file journal.pone.0248132.s130]

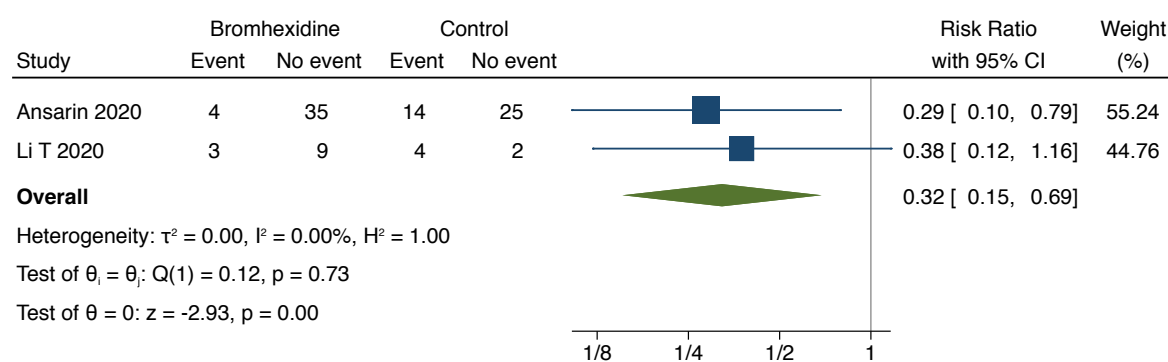

Random-effects DerSimonian-Laird model
